# Supplementary material for: Annexin A2 is regulated by ovarian cancer-peritoneal cell interactions and promotes metastasis
Source: PubMed Central journal article supplement (PMC3787151; doi:10.18632/oncotarget.1122), 2013-07-14
Supplement: oncotarget-04-1199-s001.pdf [file oncotarget-04-1199-s001.pdf]

## Annexin A2 is regulated by ovarian cancer-peritoneal cell interactions and promotes metastasis – Lokman et al

Supplementary Table 1: Annexin A2 epithelial and stromal immunostaining intensity in the normal ovaries, serous cystadenomas, serous borderline tumors and serous ovarian carcinomas (stage I-IV) tissues.

| Tissue                                 | n  | Patient age (years)<br>Median (range) | Annexin A2 epithelial staining |                   |                     |                  | Annexin A2 stromal staining |                   |
|----------------------------------------|----|---------------------------------------|--------------------------------|-------------------|---------------------|------------------|-----------------------------|-------------------|
|                                        |    |                                       | Intensity                      |                   | % of positive cells |                  | Intensity                   |                   |
|                                        |    |                                       | Low <sup>a</sup>               | High <sup>b</sup> | ≤10                 | ≥10              | Low <sup>a</sup>            | High <sup>b</sup> |
| Normal ovaries                         | 16 | 52<br>(40-83)                         | 2/16<br>(12.5%)                | 14/16<br>(87.5%)  | 1/16<br>(6.3%)      | 15/16<br>(93.8%) | 14/16<br>(87.5%)            | 2/16<br>(12.5%)   |
| Serous cystadenomas                    | 11 | 50<br>(39-66)                         | 4/11<br>(36.3%)                | 7/11<br>(63.6%)   | 2/11<br>(18.1%)     | 9/11<br>(81.8%)  | 10/11<br>(90.9%)            | 1/11<br>(9%)      |
| Serous borderline tumors               | 10 | 50<br>(32-81)                         | 0/10<br>(0%)                   | 10/10<br>(100%)   | 0/10<br>(0%)        | 10/10<br>(100%)  | 8/10<br>(80%)               | 2/10<br>(20%)     |
| Serous ovarian carcinomas (Stage I-IV) | 42 | 64<br>(27-86)                         | 4/42<br>(10%)                  | 38/42<br>(90%)    | 9/42<br>(21.5%)     | 33/42<br>(78.5%) | 14/42<br>(32.8%)            | 28/42<br>(67.3%)  |
| Chi-squared test                       |    |                                       | <i>P</i> = 0.510               |                   | <i>P</i> = 0.248    |                  | <i>P</i> < 0.0001           |                   |

<sup>a</sup> Annexin A2 low intensity score; no staining (0) and weak staining (1+)

<sup>b</sup> Annexin A2 high intensity score; moderate staining (2+) and strong staining (3+)

Supplementary Table 2: Annexin A2 epithelial and stromal immunostaining intensity in the primary tumor and matching omental metastasis tissues.

| Tissue                      | n  | Patient age (years) Median (range) | Annexin A2 epithelial staining |                   |                     |                  | Annexin A2 stromal staining |                   |
|-----------------------------|----|------------------------------------|--------------------------------|-------------------|---------------------|------------------|-----------------------------|-------------------|
|                             |    |                                    | Intensity                      |                   | % of positive cells |                  | Intensity                   |                   |
|                             |    |                                    | Low <sup>a</sup>               | High <sup>b</sup> | ≤10                 | ≥10              | Low <sup>a</sup>            | High <sup>b</sup> |
| Primary tumor               | 21 | 68<br>(49-87)                      | 0/21<br>(0%)                   | 21/21<br>(100%)   | 7/21<br>(33.3%)     | 14/21<br>(66.7%) | 9/21<br>(42.9%)             | 12/21<br>(57.2%)  |
| Matching omental metastasis | 18 |                                    | 3/18<br>(16.7%)                | 15/18<br>(83.3%)  | 10/18<br>(55.6%)    | 8/18<br>(44.4%)  | 4/18<br>(22.2%)             | 14/18<br>(77.8%)  |
| Fisher's exact test         |    |                                    | <i>P</i> = 0.089               |                   | <i>P</i> = 0.206    |                  | <i>P</i> = 0.307            |                   |

<sup>a</sup> Annexin A2 low intensity score; no staining (0) and weak staining (1+)

<sup>b</sup> Annexin A2 high intensity score; moderate staining (2+) and strong staining (3+)

Supplementary Table 3: Annexin A2 epithelial immunostaining intensity in the omental tissues.

| Omental Tissue                           | n | Patient age (years) Median (range) | Annexin A2 epithelial staining |                   |                     |             |
|------------------------------------------|---|------------------------------------|--------------------------------|-------------------|---------------------|-------------|
|                                          |   |                                    | Intensity                      |                   | % of positive cells |             |
|                                          |   |                                    | Low <sup>a</sup>               | High <sup>b</sup> | ≤10                 | ≥10         |
| Cancer cells adjacent to the peritoneum  | 9 | 58 (40-70)                         | 1/9 (11.1%)                    | 8/9 (88.9%)       | 1/9 (11.1%)         | 8/9 (88.9%) |
| Cancer cells distant from the peritoneum | 9 | 58 (40-70)                         | 4/9 (44.4%)                    | 5/9 (55.5%)       | 5/9 (55.5%)         | 4/9 (44.4%) |
| Chi-squared test                         |   |                                    | <i>P</i> = 0.114               |                   | <i>P</i> = 0.046    |             |

<sup>a</sup> Annexin A2 low intensity score; no staining (0) and weak staining (1+)

<sup>b</sup> Annexin A2 high intensity score; moderate staining (2+) and strong staining (3+)
