# Supplementary material for: Annexin A2 is regulated by ovarian cancer-peritoneal cell interactions and promotes metastasis
Source: PubMed Central journal article supplement (PMC3787151; doi:10.18632/oncotarget.1122), 2013-07-14
Supplement: oncotarget-04-1199-s002.pdf [file oncotarget-04-1199-s002.pdf]

## Annexin A2 is regulated by ovarian cancer-peritoneal cell interactions and promotes metastasis – Lokman et al

|     |            |            |            |            |            |
|-----|------------|------------|------------|------------|------------|
| 1   | MSTVHEILCK | LSLEGDHSTP | PSAYGSVKAY | TNFDAERDAL | NIETAIKTKG |
| 51  | VDEVTIVNIL | TNRSNAQRQD | IAFAYQRRTK | KELASALKSA | LSGHLETVIL |
| 101 | GLLKTPAQYD | ASELKASKMG | LGTDEDSLIE | IICSRTNQEL | QEINRVYKEM |
| 151 | YKTDLEKDII | SDTSGDFRKL | MVALAKGRRA | EDGSVIDYEL | IDQARDLYD  |
| 201 | AGVKKRGTDV | PKWISIMTER | SVPHLQKVFD | RYKSYSPYDM | LESIRKEVKG |
| 251 | DLENAFNLNV | QCIQNKPLYF | ADRLYDSMKG | KGTRDKVLIR | IMVSRSEVDM |
| 301 | LKIRSEFKRK | YGKSLYYIIQ | QDTKGDYQKA | LLYLGGDD   |            |

Supplementary Figure 1: Ion-trap mass spectrometry LC-MS/MS analysis of annexin A2 spots from the 2D gel electrophoresis. No annexin A2 peptides (red peptides: positive identified sequence via Mascot search) were observed in the N-terminal domain of annexin A2 (amino acid 1-30) in the protein spots of the 2D gel electrophoresis-silver stained gel from OVCAR-5 and LP-9 co-cultured cells conditioned media [3].

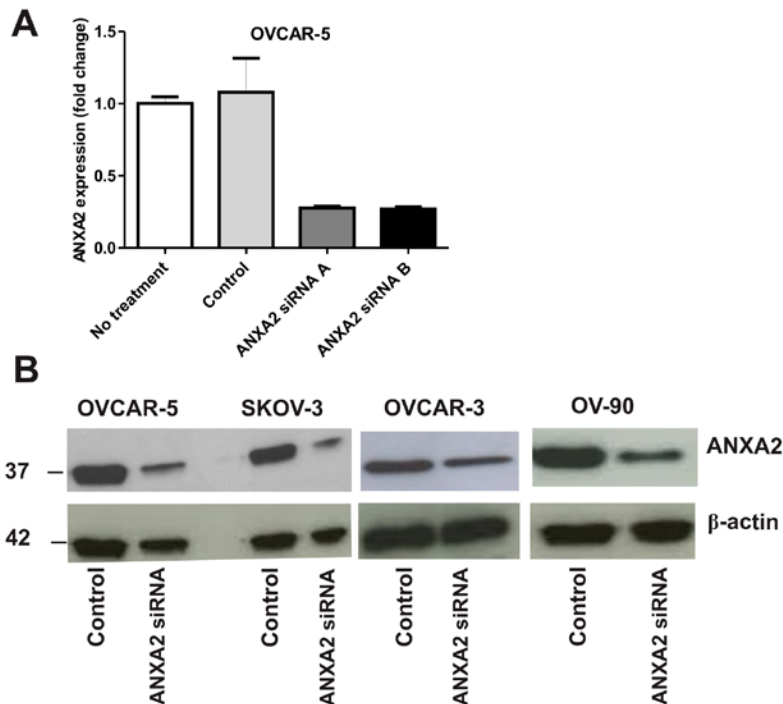

Supplementary Figure 2: Annexin A2 expression after knockdown with annexin A2 siRNAs. (A) Annexin A2 real-time PCR expression of OVCAR-5 cells after treatment with annexin A2 siRNA A and siRNA B compared with the negative control siRNA and non-treated cells, assessed using  $2^{-\Delta\Delta CT}$  quantitation method. Data represents triplicate determinations  $\pm$  SEM from 2 independent experiments. (B) Annexin A2 expression of OVCAR-5, SKOV-3, OVCAR-3 and OV-90 cells after knockdown with annexin A2 siRNA A and negative control siRNA confirmed by 1D-western immunoblotting.  $\beta$ -actin was used as a loading control.

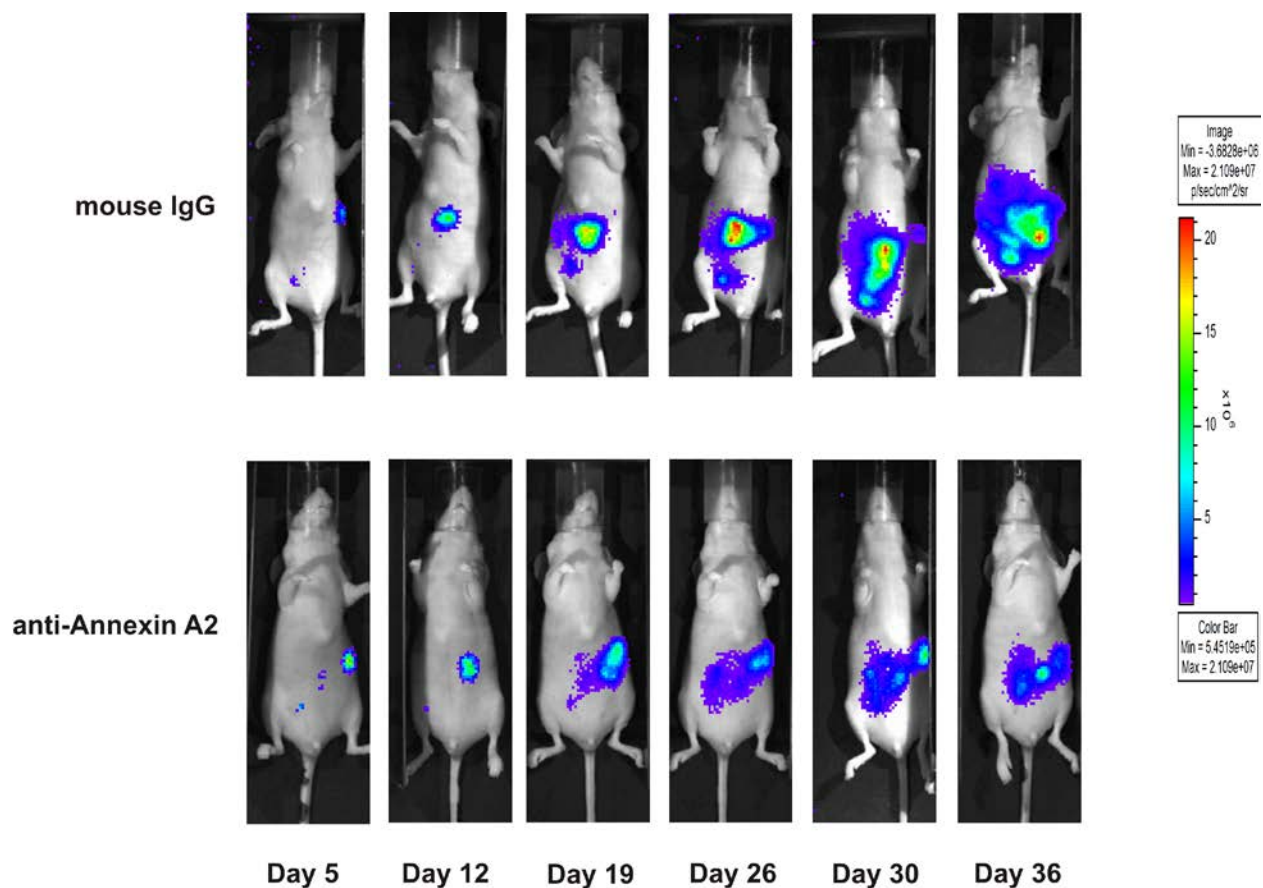

Supplementary Figure 3: IVIS imaging of mice. Mice were treated once weekly for three weeks with either mouse IgG (top row), or anti-annexin A2 antibody (bottom row). Images represent tumor growth on days 5, 12, 19, 26, 30 and 36, assessed using the IVIS Imaging. Images represent 1 sec acquisition time, and the photon emission transmitted from mice was captured and quantitated in photons/s/cm<sup>2</sup>/sr.
